# Supplementary material for: Overexpression of a Rosa rugosa Thunb. NUDX gene enhances biosynthesis of scent volatiles in petunia
Source: PeerJ journal article supplement (doi:10.7717/peerj.11098), 2021-04-02
Supplement: Additional_file_figure_S1-S5.pdf [file Additional_file_figure_S1-S5.pdf]

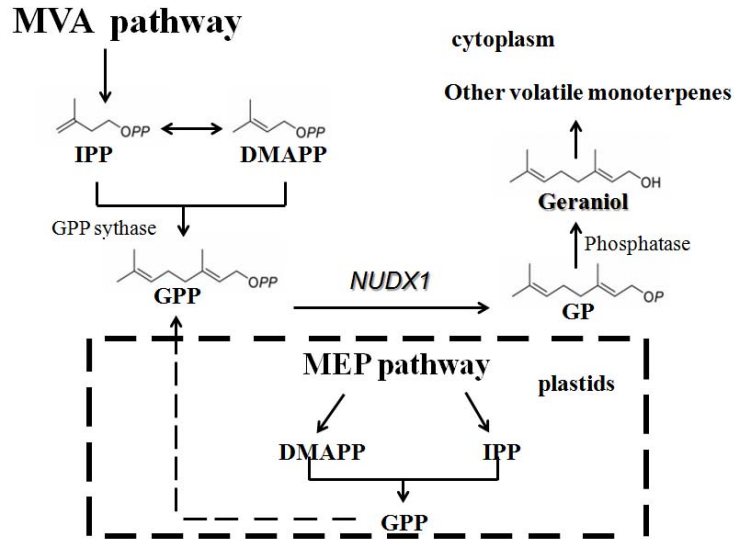

**Figure S1.** Hypothetical metabolic pathway of geraniol synthesis regulated by *NUDX1* gene in *Rosa×hybrida*. MVA, mevalonate; IPP, isopentenyl diphosphate; DMAPP, dimethylallyl diphosphate; GPP, geranyl diphosphate; GP, geranyl monophosphate; MEP, methylerythritol 4-phosphate (Tholl, D., and Gershenzon, J. 2015. The flowering of a new scent pathway in rose. *SCIENCE* 349:28-29.)

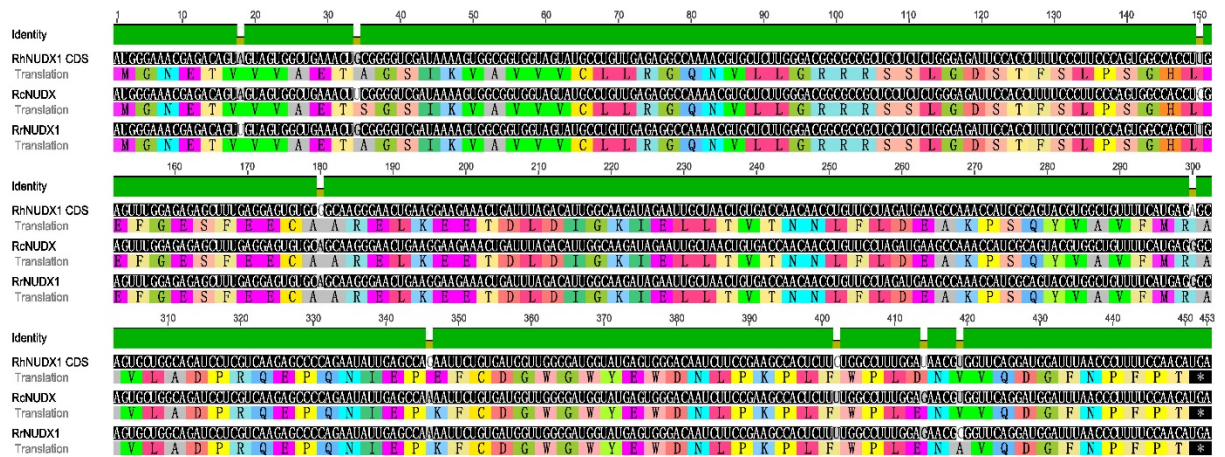

**Figure S2.** NUDX1 gene and protein sequence differences in *Rosa×hybrida* 'Papa Meiland' (Rh), *Rosa chinensis* (Rc) and *Rosa rugosa* (Rr)

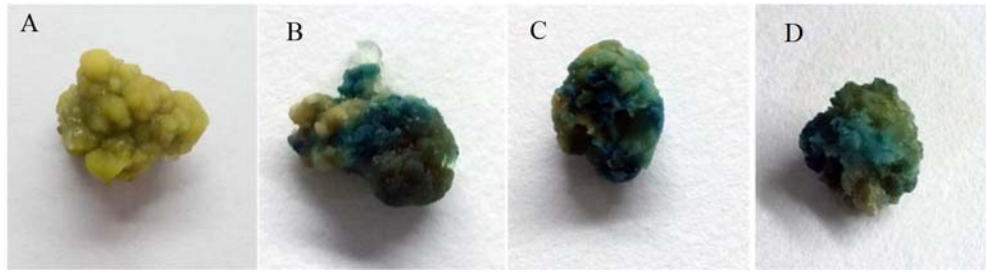

Figure S3. GUS staining results of *Petunia hybrida* callus.  
A: WT; B-D: Callus with *RrNUDX1* gene transformed

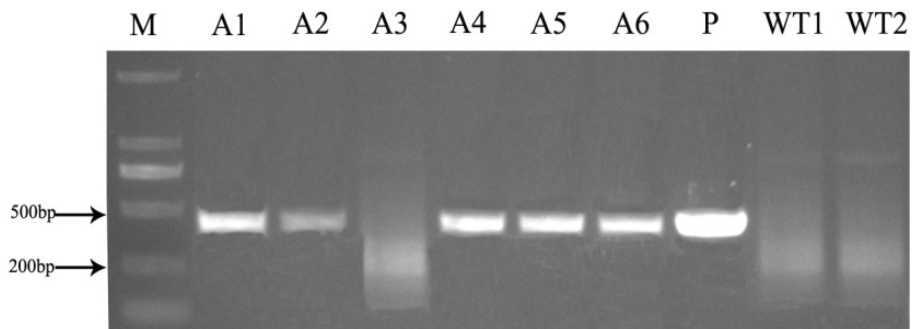

Figure S4. PCR verification of transgenic *Petunia*

M: Marker DL2000; A1-A6: overexpressing resistant plants; P: pCAMBIA1304-*RrNUDX1* plasmid; WT1-2: Wild type

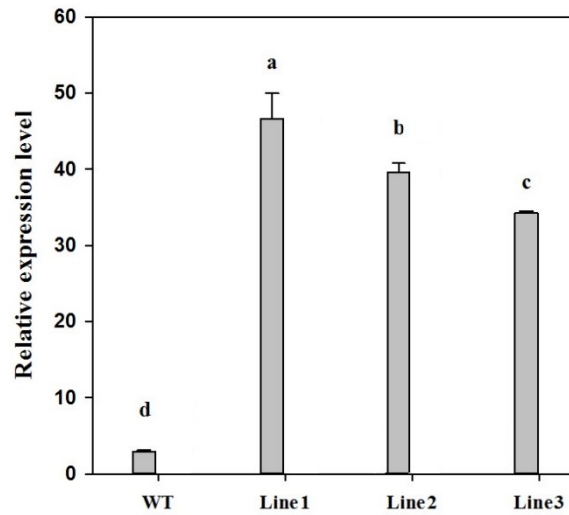

Figure S5. Expression detection of *RrNUDX1* gene in transgenic *Petunia*. Different letters (a, b, c) stand for significantly different (LSD test,  $P < 0.05$ )
